1 **Reduction in maternal mortality ratio varies by district in Sidama Regional State,**  
2 **southern Ethiopia: Estimates by cross-sectional studies using the sisterhood**  
3 **method and a household survey of pregnancy and birth outcomes**

4  
5 **Variations in reduction of maternal mortality ratio in Sidama Regional State,**  
6 **southern Ethiopia**

7 Authors

8 Aschenaki Zerihun Kea<sup>1, 2\*</sup>, Bernt Lindtjorn<sup>1, 2</sup>, Achamyesh Gebretsadik<sup>1</sup>, Sven

9 Gudmund Hinderaker<sup>2</sup>

10

11 Affiliations

12 <sup>1</sup> School of Public Health, College of Medicine and Health Sciences, Hawassa University,  
13 Hawassa, Ethiopia

14 <sup>2</sup> Centre for International Health, University of Bergen, Bergen, Norway

15 \*Corresponding author

16 Email: [aschenakizer@yahoo.com](mailto:aschenakizer@yahoo.com) (AZK)

17

1

## 18 **Abstract**

### 19 **Introduction**

20 Maternal mortality studies conducted at national level do not provide subnational and local  
21 estimates useful for program planning and monitoring maternal mortality at lower  
22 administrative level. The aim of this study was to estimate life time risk (LTR) of maternal death  
23 and maternal mortality ratio (MMR), assess variations and reduction in MMR in Sidama  
24 Regional State, southern Ethiopia.

### 25 **Methods**

26 This is cross-sectional study employed the sisterhood method as part of larger household  
27 maternal mortality survey that used a 5-year recall of pregnancy and birth outcomes. We  
28 visited 8880 households and interviewed 17444 respondents 15-49 years age. We assessed  
29 reduction in MMR using the sisterhood method (main focus of this paper) and a household  
30 survey of pregnancy and birth outcomes.

### 31 **Result**

32 We analysed 17374 (99.6%) respondents; 8884 (51.1%) men and 8490 (48.9%) women. The  
33 17,374 respondents reported 64,387 maternal sisters who had reached reproductive age.  
34 Among these, 2,402 (3.7%) sisters had died; 776 (32.3%) were pregnancy related deaths. The  
35 LTR of maternal death was 3.2% and MMR was 623 (95% CI: 573-658) per 100000 live births  
36 (LB), with reference to year 2010. The remote district (Aroresa) had a MMR of 1210 (95% CI:  
37 1027-1318) per 100,000 LB. Assessment of MMR reduction using the two maternal mortality

38 estimation methods showed that the MMR in Sidama Regional State declined over the past  
39 years. Significant reduction in MMR was observed in districts located near the regional centre.  
40 However, no reduction was observed in districts located distant to the regional centre.

## 41 **Conclusion**

42 The high MMR with district level variations and lack of mortality reduction in districts located  
43 distant to the centre highlights the need for instituting interventions tailored to the local  
44 context to save mothers and accelerate reduction in MMR.

## 45 **Introduction**

46 The government of Ethiopia has been implementing interventions aiming to reduce maternal  
47 mortality since the commencement of the Millennium Development Goal (MDG) [1], and the  
48 maternal deaths in the country fell by 61% during the MDG period. Despite these  
49 achievements, in 2017, there were an estimated 14000 maternal deaths with corresponding  
50 maternal mortality ratio (MMR) 401 per 100,000 live births (LB).

51 Currently, maternal deaths are not routinely tracked using vital registration in Ethiopia [2, 3]. In  
52 certain areas, maternal deaths are tracked through studies conducted at special settings like  
53 demographic surveillance sites [4] and hospitals [5]. The data used for monitoring maternal  
54 mortality in the country largely comes from Demographic and Health Surveys (DHS) [6] and UN  
55 agency studies [7] conducted periodically at national level. However, studies conducted at  
56 national level do not provide data on magnitude and variations of maternal deaths at district

57 level. Hence, at lower administrative level in Ethiopia, it is difficult to understand the magnitude  
58 and variations of maternal deaths and ensure reduction of MMR.

59 A recent population based household survey conducted in Sidama Regional State identified a  
60 high MMR with district level variations. The overall MMR of the region, reported by this study  
61 was 419 (95% CI: 260-577) per 100,000 LB, but Aroresa district (the remote district) had a MMR  
62 1142 (95% CI: 693-1591) deaths per 100,000 LB [8].

63 We carried out a population based household survey employing the indirect sisterhood method  
64 to measure maternal mortality in Sidama Regional State, southern Ethiopia. The indirect  
65 sisterhood method was part of larger maternal mortality survey aimed at measuring maternal  
66 mortality in Sidama Regional State using a retrospective 5-year recall period of pregnancy [8].

67 The larger study also included measuring physical access to skilled delivery using Geographic  
68 Information System. The 5-year pregnancy and birth outcome household survey helps to  
69 understand the magnitude of and district level variations in maternal mortality for recent years,  
70 whereas the indirect sisterhood method of this paper is used to understand past maternal  
71 mortality level and variations in the region and in districts included in the study.

72 The indirect sisterhood method has been validated and used in different settings [9-12]. Our  
73 specific objectives in this study using the indirect sisterhood method were 1) to estimate life  
74 time risk (LTR) of maternal death and corresponding MMR; 2) to assess variations in maternal  
75 mortality estimates based on characteristics of the respondents; 3) to assess reduction in MMR  
76 in Sidama Regional State over the past year by using MMR of the sisterhood method (main

77 focus of this paper) with results from the 5-year recall of pregnancy and birth outcome  
78 household survey.

## 79 **Methods**

### 80 **Study design and setting**

81 We carried out a cross sectional study employing the sisterhood method (main focus of this  
82 paper) as part of larger maternal mortality household survey that used a retrospective 5-year  
83 recall of pregnancy and birth outcomes [8]. The study was conducted in Sidama Regional State,  
84 Southern Ethiopia. Six districts (Aleta Chuko, Aleta Wondo, Aroresa, Daela, Hawassa Zuriya and  
85 Wondogenet) of Sidama Regional State were included in the study. The study was conducted  
86 from July 2019 to May 2020. Sidama Regional State is one of 11 regional states in the country,  
87 and its capital Hawassa is located 273 km south of Addis Ababa. The population of the region  
88 projected for 2020 was 4.3 million people. Administratively, the region is divided into 30 rural  
89 districts (*woredas*), 6 town administrations and 536 rural *kebeles* (the smallest administrative  
90 structure with an average population of 5000 people). Under the *kebele*, there are local  
91 structure known as *limatbudin* (local administrative unit consisting of 40-50 neighbouring  
92 households in average).

### 93 **The sisterhood method**

94 The sisterhood method utilizes information obtained from adult men and women about the  
95 deaths of their sisters born to the same mother, and who were in reproductive age. The  
96 sisterhood method uses the proportions of adult sisters dying during pregnancy, childbirth, or

97 the puerperium reported by adults during a census or survey. In this way, a cohort of women in  
98 reproductive age at risk of pregnancy related death is created [12, 13]. The LTR of maternal  
99 death is estimated from sister unit of risk exposure to maternal mortality. MMR is  
100 approximated using total fertility rate (TFR) of the study area [12, 13]. The MMR estimate from  
101 the indirect sisterhood method in average refers to 10-12 years prior to data collection and  
102 even can extends to 35 years when the respondents are older [12].The sisterhood method is  
103 acclaimed for simplicity, minimal time and inexpensiveness. However, it's not appropriates for  
104 monitoring short term progress [14].

## 105 **Study population and sampling techniques**

106 Men and women aged 15-49 years in Sidama Regional State were source population of the  
107 study, and men and women of same age and residing in sampled households were the study  
108 population.

109 The detailed sampling techniques of the study has been described elsewhere [8]. Below, we  
110 summarize the sampling technique of the sisterhood method conducted as part of a larger  
111 maternal mortality household survey. Multistage cluster sampling techniques was employed to  
112 identify the study participants. At first stage, we randomly selected six districts from the region.  
113 At second stage, we selected 40 *kebeles* from the six districts proportional to the size of *kebeles*  
114 in the districts. Thirdly, from each *kebele*, we sampled 6 *limatbudin* and finally selected 37  
115 households from each *limatbudin*. Men and women 15-49 years age residing in the sampled  
116 households were eligible for the sisterhood interview. When two or more men or women born

117 to the same mother were found in the same household, one of them was selected by a lottery  
118 method to avoid multiple counting of the same sisters.

## 119 **Variables**

120 Life time risk of maternal deaths and MMR; maternal deaths per 100,000 LB were the outcome  
121 measures of the study. We also collected characteristics of the respondents, like sex, age and  
122 educational level to assess their association with the outcome measures of interest.

## 123 **Data source and measurement**

124 We carried out an interview with 17444 participants and analysed the data of 17374  
125 participants; 8884 (51.1%) men and 8490 (48.9%) women 15-49 years age. The participants  
126 were residents of the 8880 households of the survey [8]. The data was collected by diploma  
127 level teachers recruited from each *kebele* who were familiar with the culture and language of  
128 the study area. The data collectors conducted an interview with men and women 15-49 years  
129 using interviewer administered questionnaire. Participants were asked the following four  
130 standard questions used in indirect sisterhood method [12]. 1) How many sisters (born to the  
131 same mother) have you ever had who reached 15 years? 2) How many of these sisters who  
132 ever-reached 15 years are alive now? 3) How many of these sisters who ever-reached 15 years  
133 are dead? 4) How many of these dead sisters died while they were pregnant, or during  
134 childbirth, or during the six weeks after the end of pregnancy?

135 The first question addresses the number of sisters who were at risk of pregnancy related deaths  
136 while the fourth question identifies the actual number of pregnancy related deaths.

137 Interviewers were observant to ensure the sum of question 2 and 3 equals to question 1 as a

138 quality assurance of numbers. The period of six weeks after the end of pregnancy in question 4  
139 was approximated 2 months after the end of pregnancy.

## 140 **Data quality control**

141 We adapted the standard sisterhood questions to local context [12]. The questionnaire was  
142 prepared in English, translated into local language (*Sidaamu Afoo*) and back translated to  
143 English by another individual to check its consistency. Before actual data collection, the  
144 questionnaire was pretested in one district not included in the study.

145 The data collectors and supervisors were trained by the principal investigator. The training was  
146 part of the larger survey training in which one day was scheduled for the sisterhood. The  
147 training content included discussion on the content and aim of each question, interview  
148 techniques and role plays. The data collectors were supervised by two public health officers  
149 recruited from each district who were also familiar with the culture and language of the study  
150 setting. The supervisors followed the data collectors, checked consistency and completeness of  
151 the questionnaire. When eligible respondents were absent during initial visit, the data  
152 collectors revisited the households the next day.

153 The data was double entered using EpiData software (EpiData Association 2000-2021,  
154 Denmark). Consistency of the two entries was checked and discrepancies validated from the  
155 hard copies of the questionnaire.



## 156 **Sample size determination**

157 Hanley and colleagues suggested that, in settings where the MMR within the range of 500 per  
158 100,000 LB, the death of 385 sisters with ( $\pm$  10% margin of error) will be reported from  
159 interviews of 13000 adult respondents aged 15-49 [13]. According to the 2016 EDHS report,  
160 the MMR of Ethiopia was 412/100,000 LB [6]. Adding 10% non-responses, we decided to  
161 interview 14,300 respondents. The number of households planned for the larger maternal  
162 mortality household survey was 8880. We assumed that, surveying the 8880 household would  
163 be sufficient to get the desired sample of adult respondents for the sisterhood study.

## 164 **Statistical analysis**

165 Stata 15 were used for data analysis. Before LTR and MMR computation, two adjustments  
166 were made [12]. The first adjustment was made to the younger age group. The respondents in  
167 younger age group (15-19 and 20-24) would have sisters who have not yet reached age 15.  
168 Hence, we created hypothetical number of sisters that would have been reported by the young  
169 age group. To get this number, we calculated the average number of sisters reported by older  
170 age group (25-49) and multiplied by the initial number of sisters reported by the younger age  
171 group. The average number of sisters reported by age group 25-49 was 2.77 (37072/13401).  
172 Therefore, the number of sisters reported by age group 15-19 was 1475 and multiplied by 2.77  
173 it equals to 4086; and same for age group 20-24 (8386 sisters x 2.77=23229).

174 The second adjustment was made to get sisters exposed to full lifetime risk exposure [12]. As  
175 we interviewed participants aged below 50, we did not have information about full lifetime risk  
176 of all their sisters. Hence, we multiplied the sister unit of risk exposure of each age group with

177 the adjustment factor in order to get “complete” sister units of risk exposure. The adjustment  
178 factor was a number calculated for risk exposure of different age group in developing  
179 countries which is independent of a particular country [12].

180 Descriptive statistics with means and percentages were computed to describe participants’  
181 characteristics. The LTR for maternal death was obtained by dividing the total number of  
182 maternal deaths reported by the estimated total number of sisters exposed (LTR= (Total  
183 number of maternal deaths)/ (Total sister units of risk exposure). We used total fertility rate  
184 (TFR) of rural population of Ethiopia 5.2 [6] to estimate MMR from the LTR. (MMR = (1-[(1- LTR)  
185 1/TFR] x 100,000), using formulas specified by Hanley et al. [13].

186 The corresponding time period to which our estimate refers was computed using the following  
187 formula:  $T = \frac{\sum(T(i) * B(i))}{\sum B(i)}$ , where T = the point time location of the global estimate, T(i) = the  
188 time location of the estimate for each age group and B(i) = the exposing units of each age group  
189 [12]. We carried out stratified analysis based on respondents’ sex, age, and location to see the  
190 association with the outcome measure.

191 Finally, we assessed differences and reduction in MMR in Sidama Regional State and in the  
192 districts included in this study using the two maternal mortality estimations methods: the  
193 sisterhood method and the 5-year recall of pregnancy and birth outcome household survey [8].  
194 The reference period for the sisterhood method MMR estimation was 2010 whereas the  
195 reference period for 5-year recall of pregnancy and child birth outcome MMR estimation was  
196 from July 2014-June 2019.

## 197 **Ethical approval**

198 We obtained the ethical approval for this study from institutional review board (IRB/015/11) of  
199 Hawassa University College of Medicine and Health Sciences and Regional Ethical Committee of  
200 Western Norway (2018/2389/REK vest). We got support letter from the Sidama Regional Health  
201 Bureau (formerly known Sidama Zone Health Department), and from the district health offices  
202 and *kebeles*. Informed (thumb print and signed) consent was obtained from the respondents.  
203 We removed the identifiers of the respondents during data entry and analysis.

## 204 **Result**

205 Table 1 shows the background characteristics of the respondents. We conducted an interview  
206 with 17,444 men and women 15-49 years of age residing in 8880 households. Seventy (0.4%)  
207 respondents had incomplete information and were excluded from the analysis. There was no  
208 reported death of sisters from the 70 respondents with incomplete information. The final  
209 analysis included 17,374 (99.6%) respondents: 8,884 (51.1%) men and 8,490 (48.9%) women.  
210 The mean age of the respondents was 29.3 years (SD=6.8), 20.5% had no formal education and  
211 15.2% had attended high school or higher education.

212

213

214

215

216 **Table 1.** Characteristics of respondents of maternal mortality survey using the sisterhood  
217 method, in Sidama Regional State, southern Ethiopia, 2020

| Characterstics of respondents | Number of respondents | Percentage |
|-------------------------------|-----------------------|------------|
| District (Woreda)             |                       |            |
| Aleta Chuko                   | 3722                  | 21.4       |
| Aleta Wondo                   | 3929                  | 22.6       |
| Aroresa                       | 2530                  | 14.6       |
| Daela                         | 990                   | 5.7        |
| Hawassa Zuriya                | 3925                  | 22.6       |
| Wondogenet                    | 2278                  | 13.1       |
| Sex                           |                       |            |
| Men                           | 8490                  | 48.9       |
| Women                         | 8884                  | 51.1       |
| Educational level             |                       |            |
| No formal education           | 3557                  | 20.5       |
| Grade 1-4                     | 4397                  | 25.3       |
| Grade 5-8                     | 6776                  | 39.0       |
| High school or above          | 2644                  | 15.2       |
| Age group                     |                       |            |
| 15-19                         | 706                   | 4.1        |
| 20-24                         | 3267                  | 18.8       |
| 25-29                         | 4892                  | 28.1       |
| 30-34                         | 4216                  | 24.3       |
| 35-39                         | 2530                  | 14.6       |
| 40-44                         | 1221                  | 7.0        |
| 45-49                         | 542                   | 3.1        |

218  
219 Table 2 shows maternal mortality estimates by 5 year age groups. The 17,374 respondents  
220 reported a total of 64,387 maternal sisters who had reached 15 years or older, and on average  
221 each respondent reported 3.7 sisters. Of the 64,387 reported sisters who had reached 15 years  
222 or more, 2,402 (3.7%) sisters had died. From those who had died, 776 (32.3%) were pregnancy  
223 related deaths. The total LTR of maternal death was 3.2% i.e. 1 in 31 women 15-49 years old  
224 dies due to maternal cause. Using total fertility rate of 5.2, the estimated MMR for the study

225 area was 623 (95% CI: 573-658) per 100,000 LB. The approximate time reference for the MMR  
 226 estimate was the year 2010, corresponding 10 years prior to data collection.

227 **Table 2.** Estimate of lifetime risk of maternal death using the sisterhood method  
 228 referring to 2010, in Sidama Regional State, southern Ethiopia, 2020

| Age group of respondents ( years) | Number of respondents (N) | Sisters reached age >=15 (e) | Number of death from all cause (c) | Number of Pregnancy related death (r) | Adjustment factor (f) | Sister units of exposure (B)=ef | Lifetime risk (Q)=r/B |
|-----------------------------------|---------------------------|------------------------------|------------------------------------|---------------------------------------|-----------------------|---------------------------------|-----------------------|
| 15-19                             | 706                       | 4086*                        | 33                                 | 9                                     | 0.107                 | 437                             | 0.021                 |
| 20-24                             | 3267                      | 23229*                       | 269                                | 77                                    | 0.206                 | 4785                            | 0.016                 |
| 25-29                             | 4892                      | 13474                        | 561                                | 191                                   | 0.343                 | 4622                            | 0.041                 |
| 30-34                             | 4216                      | 11867                        | 706                                | 227                                   | 0.503                 | 5969                            | 0.038                 |
| 35-39                             | 2530                      | 7123                         | 464                                | 159                                   | 0.664                 | 4730                            | 0.034                 |
| 40-44                             | 1221                      | 3289                         | 258                                | 73                                    | 0.802                 | 2638                            | 0.028                 |
| 45-49                             | 542                       | 1319                         | 111                                | 40                                    | 0.9                   | 1187                            | 0.034                 |
| Total                             | 17374                     | 64387                        | 2402                               | 776                                   |                       | 24368                           | 0.032                 |

Note: \* The expected number of sisters reaching age 15 and above in the younger age groups (age 15-19 and age 20-24) was calculated by multiplying the average number of sisters reported among respondents aged 25-49 (which is 2.77) with the original number of sisters reported by respondents in younger age. The original number of reported sisters in age group 15-19 was 1475 while in age group 20-24 was 8386

229

230 To estimate MMR for the most recent period, we repeated the procedure in Table 2 stratifying  
 231 the participants in three age group: 15-29, 30-39 and 40-49 (Table 3 A). The MMR among  
 232 participants in the 15-29 age group was 545 (95% CI: 475-601) per 100, 000 LB, reflecting 7  
 233 years before data collection. For respondents in the 30-39 age group, the MMR was 703 (624-  
 234 760) per 100, 000 LB, reflecting a period 11 years before the study. For respondents 40 years or  
 235 more, the MMR was 564 (455-660) per 100, 000 LB, reflecting a period 15 years before data  
 236 collection.

237

238 **Table 3A.** Maternal mortality estimate and reference period by age group using the  
239 sisterhood method, in Sidama Regional State, southern Ethiopia, 2020

| Age group                  | 15-29   | 30-39   | 40-49   | Total   |
|----------------------------|---------|---------|---------|---------|
| Respondents                | 8865    | 6746    | 1763    | 17374   |
| Sisters 15y+               | 40789   | 18990   | 4608    | 64387   |
| Sisters 15y+ died          | 863     | 1170    | 369     | 2402    |
| Sisters 15y+ died maternal | 277     | 386     | 113     | 776     |
| Sisters exposed to risk    | 9844    | 10699   | 3825    | 24368   |
| Lifetime risk              | 0.028   | 0.036   | 0.029   | 0.032   |
| MMR*                       | 545     | 703     | 564     | 623     |
| 95% CI for MMR             | 476-601 | 624-760 | 455-660 | 573-658 |
| Estimated years back       | 7.4     | 10.6    | 15.3    | 10.2    |

Note: \* Maternal mortality ratio per 100, 000 LB, CI: Confidence Interval

240  
241 Table 3B shows the life time risk of maternal death and MMR stratified by male and female  
242 respondents. There was no statistically significant difference among male and female  
243 respondents.

244

245

246

247

248

249

250 **Table 3B.** Maternal mortality estimate by sex of respondents, using the sisterhood  
 251 method, in Sidama Regional State, southern Ethiopia, 2020

|                            | Male    | Female  | Total   |
|----------------------------|---------|---------|---------|
| Respondents                | 8490    | 8884    | 17374   |
| Sisters 15y+               | 26087   | 38485   | 64387   |
| Sisters 15y+ died          | 1276    | 1126    | 2402    |
| Sisters 15y+ died maternal | 397     | 379     | 776     |
| Sisters exposed to risk    | 12830   | 11574   | 24368   |
| Lifetime risk              | 0.031   | 0.033   | 0.032   |
| MMR*                       | 604     | 643     | 623     |
| 95% CI for MMR             | 538-654 | 572-697 | 573-658 |

252 Note: \* Maternal mortality ratio per 100,000 live birth, CI: Confidence Interval

253 Table 3C shows stratified analysis of maternal mortality estimates by the districts of  
 254 respondents. The MMR in Aroresa district was significantly higher than all other study districts  
 255 in the region; MMR: 1210 (95% CI: 1027-1318) per 100,000 LB.

256 **Table 3C.** Maternal mortality estimate by district of respondents using the sisterhood  
 257 method, in Sidama Regional State, southern Ethiopia, 2020

|                               | Aleta-<br>Chuko | Aleta-<br>Wondo | Aroresa     | Daela     | Hawassa<br>Zuriya | Wondo-<br>genet |
|-------------------------------|-----------------|-----------------|-------------|-----------|-------------------|-----------------|
| Respondents                   | 3722            | 3929            | 2530        | 990       | 3925              | 2278            |
| Sisters 15y+                  | 13602           | 17155           | 9924        | 4107      | 12557             | 6962            |
| Sisters 15y+ died             | 595             | 478             | 502         | 171       | 441               | 215             |
| Sisters 15y+ died<br>maternal | 136             | 128             | 236         | 48        | 161               | 67              |
| Sisters exposed to risk       | 5432            | 5949            | 3848        | 1725      | 4446              | 2938            |
| Lifetime risk                 | 0.025           | 0.022           | 0.061       | 0.028     | 0.036             | 0.023           |
| MMR* estimate                 | 486             | 417             | 1210        | 541       | 707               | 442             |
| 95% CI for MMR                | 409 – 561       | 351 – 495       | 1027 – 1318 | 389 – 688 | 587 – 798         | 338 – 547       |

Note: \* Maternal mortality ratio per 100, 000 LB, CI: Confidence Interval

258

259 Table 4 describes the estimated MMR by two different methods. The sisterhood method refers  
 260 to around 10 years before the study and showed the overall MMR of 623/100,000 LB in Sidama  
 261 Regional State. The survey with 5yr recall found 419/100,000 LB with slightly overlapping  
 262 confidence intervals. Some districts had lower MMR in the survey of 5yr pregnancy recall than  
 263 the sisterhood estimates reflecting 10 years back, whereas others like Aroresa had similar  
 264 estimates in both.

265 **Table 4.** Estimates of maternal mortality ratio by two methods in Sidama Regional State,  
 266 southern Ethiopia, 2020.

| District        | MMR using 5 year recall of pregnancy and birth outcome* |                |                 | MMR using the indirect sisterhood method** |                          |                              |       |                  |
|-----------------|---------------------------------------------------------|----------------|-----------------|--------------------------------------------|--------------------------|------------------------------|-------|------------------|
|                 | Live birth                                              | Maternal death | MMR (95% CI)    | Number of respondents                      | Pregnancy related deaths | Sister units exposed to risk | LTR   | MMR (95% CI)     |
| Aleta Chuko     | 2265                                                    | 5              | 263 (58-467)    | 3722                                       | 136                      | 5432                         | 0.025 | 486 (409-561)    |
| Aleta Wondo     | 2285                                                    | 12             | 525 (207-842)   | 3929                                       | 128                      | 5949                         | 0.022 | 417 (351-495)    |
| Aroresa         | 1694                                                    | 21             | 1142 (693-1591) | 2530                                       | 236                      | 3848                         | 0.061 | 1210 (1027-1318) |
| Daela           | 716                                                     | 4              | 641 (77-1358)   | 990                                        | 48                       | 1725                         | 0.028 | 541 (389-688)    |
| Hawassa- Zuriya | 2237                                                    | 2              | 114 (24-251)    | 3925                                       | 161                      | 4446                         | 0.036 | 707 (587-798)    |
| Wondogenet      | 1405                                                    | 4              | 258 (8-508)     | 2278                                       | 67                       | 2938                         | 0.023 | 442 (338-547)    |
| Sidama Region   | 10602                                                   | 48             | 419 (260-577)   | 17374                                      | 776                      | 24338                        | 0.032 | 623 (573-658)    |

Note: \*Reference year: July 2014-June 2019, \*\* Reference year: 2010, Abbreviations: MMR: maternal mortality ratio per 100,000 live birth, LTR: life time risk for maternal death, CI: confidence interval

267

268

269



## 270 **Discussion**

### 271 **Principal findings**

272 By incorporating the sisterhood method in a household survey of pregnancy and birth  
273 outcomes, we found a lifetime risk of maternal death of 3.2 %, with a corresponding MMR of  
274 623 per 100,000 LB; the time reference was 2010. The remote district (Aroresa) had  
275 significantly higher MMR. Sub analysis of MMR based on the respondents' age showed that  
276 participants 15-29 years of age had a MMR; 545 per 100, 000 LB, reflecting 7 years before data  
277 collection.

278 MMR estimated by a household survey that used a 5-year recall of pregnancy found an  
279 estimated MMR of 419 per 100,000 LB and the sisterhood method referring to 10 years before  
280 the study found 623 per 100,000 LB, slightly overlapping confidence intervals. Districts located  
281 distant from the centre with poor infrastructure and inadequate skilled health personnel did  
282 had similar MMR by both methods and seem to have persistently high MMR. Whereas,  
283 districts located near to the centre with good infrastructure and adequate skilled health  
284 personnel have lower estimated MMR by the 5-year recall than by the sisterhood method.

### 285 **Strengths and weaknesses of the study**

286 To the best of our knowledge, this is the first study describing maternal mortality estimates  
287 employing the sisterhood method in Sidama Regional State, southern Ethiopia. The study was  
288 conducted using large and representative sample of the region that demonstrated district level  
289 variations. By assessing the MMR of the sisterhood method and the estimates from household

290 maternal mortality survey that used a 5-year pregnancy and birth outcomes [8], this study  
291 identified variations in MMR reduction in different geographical areas of the region.

292 This study had some limitations similar to other studies employed the sisterhood method. The  
293 maternal mortality estimates we reported refer a period around 10 years before data  
294 collection; thus we were not able to show recent estimates using this method.

295 There might be over-reporting of deaths. Over reporting of deaths may arise due to inclusion of  
296 deaths that occurred beyond six weeks of end of pregnancy or cases which were not related to  
297 pregnancy. Multiple counting could also be the reason for over-estimation of maternal deaths  
298 using the sisterhood method.

299 To minimize over-reporting, we used data collectors who were familiar with language and  
300 culture of the study population. As a result of familiarity with local context, the data collectors  
301 supported participants in identifying pregnancy state of deceased sisters and time of their  
302 deaths. In addition, in households where more than one eligible participants born to the same  
303 mother were found, we chose one of them by a lottery method which minimized multiple  
304 counting. Despite our effort, there might be over-reporting in our study.

305 Underreporting could also be another limitation for this study. Deaths occurring at early stage  
306 of pregnancy due to abortion or ectopic pregnancy and deaths of women not in marital union  
307 might not be reported.

308 We did not have information on place of living for the sisters in the cohort. We used the  
309 respondents' residences as proxy for the sisters' location. Some sisters might have moved to  
310 other districts. Our study also lack information on age at death of respondents' sisters but used

311 respondents' age to observe recent deaths and show patterns of deaths across age groups. Age  
312 of the respondents may not closely reflect the age of their sisters.

### 313 **Maternal mortality ratios and variations using the sisterhood method**

314 We found high MMR in the study area with time reference in 2010. Our result is significantly  
315 higher than the findings of national DHS [6], which reported a MMR 412 per 100,000 LB (time  
316 reference, 2009-2016). The DHS study uses the direct sisterhood method which included  
317 detailed information on age at death, year of deaths and years since the death occurred which  
318 contributed for precise maternal mortality estimates [15]. However, in our study, we used the  
319 indirect sisterhood method in which such detailed information is not included. The inherent  
320 weakness of the indirect sisterhood method lacking exact information on age at death, year of  
321 death and years since the death occurred may overestimate the deaths[14].

322 The estimate from our study was also higher than a study from Kersa Health and Demographic  
323 Surveillance Site (HDSS) [16], which estimated a MMR of 396 per 100,000 LB for the year 2010.  
324 The variation could be explained by the differences of methods the two studies used for MMR  
325 estimation, access to maternal health care and differences in documentation of maternal  
326 deaths. The Kersa's study employed direct method of maternal mortality estimation, whereas  
327 we used the indirect sisterhood method which might have caused over reporting of maternal  
328 deaths [11]. Mothers in Kersa DHSS might have better access to health related information and  
329 improved maternal health service utilization due to DHSS activities which in turn might have  
330 contributed for reduction of maternal deaths in the area. In addition, in Kersa's DHSS there also

331 might be improved vital registration system that supported accurate documentation of  
332 maternal deaths.

333 A study from Gamo-Gofa south-west Ethiopia, using the sisterhood method with a time  
334 reference of 1998 found a MMR 1667 per 100,000 LB, which is higher than our study [11] but  
335 carried out a decade before our study. The government has implemented many interventions  
336 since that study to improve universal health coverage on maternal health services which might  
337 have contributed for a reduction of maternal mortality in our area [1].

338 In our study, we found similar maternal mortality estimates both from men and women  
339 respondents. This shows that the information obtained from men siblings is as valid as women  
340 siblings in estimating maternal mortality using the indirect sisterhood method. This is in  
341 agreement with report from south-west Ethiopia [11]. A study carried out using DHS data from  
342 African countries also found similar findings [17].

343 This study found high maternal mortality estimates among the respondents in the 30-39 age  
344 group; MMR: 703 per 100,000 LB compared to participants in 15-29 years of age. Our finding is  
345 different from findings reported from Nigeria where they found the highest MMR among the  
346 respondents in the 15-29 age group [10]. Though we did not have information on age of the  
347 diseased sisters (only respondents), the difference in age at first marriage might have  
348 contributed for the variations observed in two settings. In Ethiopia, the average age at first  
349 marriage was reported to be 17 [6] while 13 years was reported from Mali [9].

350 Our study has also shown significant variations in MMR by districts of the respondents. This is in  
351 agreement with the findings of study conducted in northern Nigeria and Mali [9, 10] where they

352 reported that maternal mortality differed by local government areas and villages respectively.  
353 The areas with high maternal mortality in those studies were characterized by remoteness and  
354 problematic access to health facilities. Previously, studies have used the place of the  
355 respondents as a proxy location for the sisters of the respondents to describe the differences in  
356 deaths based on the location of the respondents [9, 10].

357 The high MMR observed in Aroresa districts (the remote district) could be explained by poor  
358 road facilities and difficult topography that might hamper access to health services. Aroresa  
359 district is situated 181 km away from the regional centre [18]. The distance from the centre  
360 may affect availability of services during emergency situation. Weak emergency obstetric care  
361 compounded with lack of adequate and skilled personnel might have also contributed for the  
362 high maternal mortality in the district. Low utilization rate of maternal health services could  
363 also explain the high MMR in Aroresa district, and a paper from this area in 2018 reported  
364 institutional delivery in 38% and use of contraceptives in 49% [18].

### 365 **Maternal mortality reduction in Sidama Regional State**

366 A study from India reported there existed regional and district level variations in maternal  
367 mortality reduction across the country [19]. In our study of Hawassa Zuriya district (the central  
368 district), the sisterhood study reflecting 10 years back gave a MMR of 707 and 5y recall gave  
369 114 per 100.000 LB. The apparent reduction in MMR in this district could be attributed to  
370 improved access to obstetric care during emergency situation as the district is located near to  
371 the referral centre at the regional capital Hawassa [8] with good infrastructure and road facility.  
372 Moreover, the district is characterized by having relatively high doctor to population ratio and

373 midwife to population ratio which might have improved access to skilled obstetric care [8]. An  
374 Indonesian study demonstrated that investment in doctors and hospitals would significantly  
375 reduce the MMR [20]. Contrary to Hawassa Zuriya district (the central district), in Aroresa  
376 district (the remote district), the two studies found high MMR with no reduction of MMR over  
377 the past years.

## 378 **Validity of maternal mortality measurements**

379 We incorporated the sisterhood questions to the ongoing maternal mortality household survey  
380 that used a 5-year recall of pregnancy and birth outcomes to determine the MMR. We added 4  
381 questions of the indirect sisterhood to the main study questionnaire and collected the data  
382 from respondents residing in the same households sampled for the main study using the same  
383 enumerators. There was no major cost and logistics incurred due to inclusion of the sisterhood  
384 questions to the main household survey questionnaire. However, the main household study  
385 incurred costs in terms of time, logistics and money. Despite the costs incurred, such studies  
386 provide important information on magnitude and variations of MMR which is useful for  
387 program planning, priority setting and resource allocation at lower administrative level.

388 We considered the size of the sample and sampling techniques while conducting the studies  
389 using the two maternal mortality estimation methods in order to precisely estimate the MMR  
390 in the region. Hence, large number of participants were included in both 5-year recall of  
391 pregnancy and birth outcome household survey and the sisterhood study. In 5-year recall of  
392 pregnancy and birth outcome household survey, we registered 10602 LB and 48 maternal  
393 deaths in 8880 households visited. Our aim was to find 66 maternal deaths with MMR; 412

394 (95% CI: 324-524) per 100,000 LB. The MMR after the study was 419 (95% CI: 260-577) which is  
395 within the 95% CI we anticipated initially [8]. For the sisterhood study, we had an interview  
396 with 17444 siblings. This sample size was above the recommended 13,000 siblings for the  
397 indirect sisterhood study in settings with similar magnitude of maternal mortality [13]. The  
398 samples for both studies were selected using probability sampling and multistage cluster  
399 sampling technique was employed to select the study participants.

400 The MMR we found using the sisterhood method was higher than the findings from other  
401 studies in the same time reference [6]. Over-estimation of MMR from studies that used the  
402 sisterhood method have been documented [11]. The MMR obtained from the household  
403 survey was comparable with other national figures [6, 7].

404 Recall bias is a potential limitation both in the household survey study and the sisterhood study  
405 as the conclusions of the studies were based on the information obtained from families  
406 memorizing past events of maternal deaths. We believe that the recall bias is low in 5-year  
407 recall of pregnancy and birth outcome study than the sisterhood as the deaths were occurred in  
408 the recent years and the interviews were conducted with close relatives who lived together  
409 with the deceased mother.

410 Under-estimation could also be another limitation for both studies. Stigma of pregnancies of  
411 unmarried girls may lead to under-reporting. Maternal deaths occurring at early stage of  
412 pregnancy due to abortion or ectopic pregnancy may be missed and regarded as non-maternal  
413 deaths within the community.

## 414 **Policy and clinical implications**

415 Persistently high maternal mortality in districts found in remote area, far away from central city  
416 with poor infrastructure and inadequate skilled health workers calls for the attention from the  
417 government and the importance of instituting interventions tailored to the local context to  
418 improve poor infrastructure and shortage of skilled health personnel in Sidama Region State.  
419 Analysis of results from recent maternal mortality estimation using the 5-year recall of  
420 pregnancy and birth outcome household survey with the sisterhood method suggests the  
421 possibility of monitoring maternal mortality reduction at regional and district level using the  
422 two estimation methods.

## 423 **Conclusion**

424 This study used two methods for estimating maternal deaths in Sidama, Ethiopia, one referring to last 5  
425 years and the other 10 years back. The central districts have a lower MMR than before, but peripheral  
426 districts still have high MMR. The Sidama Regional Health Bureau and respective district health  
427 offices should implement interventions tailored to the local context to address variations and  
428 accelerate reductions in MMR.

## 429 **Acknowledgements**

430 We are grateful to the participants of the study for their time and information. Our special  
431 gratitude goes to Sidama Regional Health Bureau, respective district health offices and *kebele*  
432 administrations in Ethiopia for their support and permission to conduct the study.



## 433 Authors' contributions

434 AZK, BL and SGH conceived and designed the experiments. AZK, BL and SGH performed the  
435 experiments. AZK analysed the data. BL, AGT and SGH supervised and provided mentorship.  
436 AZK drafted the article. All authors contributed to the writing, reviewed the article and  
437 approved the final version of the manuscript.

438

439

440

441

## 442 References

- 443 1. Ayele AA, Tefera YG, East L. Ethiopia's commitment towards achieving sustainable development  
444 goal on reduction of maternal mortality: There is a long way to go. *Women's Health*. 2021; 17.  
445 doi: [10.1177/17455065211067073](https://doi.org/10.1177/17455065211067073) PMID: [34913391](https://pubmed.ncbi.nlm.nih.gov/34913391/)
- 446 2. World Bank, World Health Organization. Global Civil Registration and Vital Statistics: Scaling up  
447 Investment Plan 2015-2024. World Bank Group. 2014.
- 448 3. Abay ST, Gebre-Egziabher AG. Status and associated factors of birth registration in selected  
449 districts of Tigray region, Ethiopia. *BMC Int Health Hum Rights*. 2020; 20 (20). doi:  
450 [10.1186/s12914-020-00235-x](https://doi.org/10.1186/s12914-020-00235-x) PMID: [32727474](https://pubmed.ncbi.nlm.nih.gov/32727474/)
- 451 4. Tesfaye G, Loxton D, Chojenta C, Assefa N, Smith R. Magnitude, trends and causes of maternal  
452 mortality among reproductive aged women in Kersa health and demographic surveillance  
453 system, eastern Ethiopia. *BMC Women's Health*. 2018; 18(198). doi: [10.1186/s12905-018-0690-](https://doi.org/10.1186/s12905-018-0690-1)  
454 [1](https://doi.org/10.1186/s12905-018-0690-1) PMID: [30518368](https://pubmed.ncbi.nlm.nih.gov/30518368/)
- 455 5. Legesse T, Abdulahi M, Dirar A. Trends and causes of maternal mortality in Jimma University  
456 Specialized Hospital, southwest Ethiopia: a matched case-control study. *Int J Women's Health*.  
457 2017;9: 307-313. doi: [10.2147/IJWH.S123455](https://doi.org/10.2147/IJWH.S123455) PMID: [28496370](https://pubmed.ncbi.nlm.nih.gov/28496370/)
- 458 6. Central Statistical Agency Ethiopia: The DHS Program ICF Rockville Maryland, USA. Demographic  
459 and Health Survey 2016 Final Report. 2017.
- 460 7. WHO, UNICEF, UNFPA, WORLD BANK, UNPD. Trends in Maternal Mortality: 2000-2017. WHO,  
461 UNICEF, UNFPA, UNDP and The World Bank estimates. 2019.
- 462 8. Aschenaki Zerihun Kea, Bernt Lindtjorn, Achamyesh Gebretsadik, Hinderaker SG. Variation in  
463 maternal mortality in Sidama Regional State, southern Ethiopia: A population based cross

- 464 sectional household survey. medRxiv 277635 [preprint] [posted 2022 July 14]. Available from:  
465 <https://medrxiv.org/cgi/content/short/2022.07.14.22277635v1>
- 466 9. Aa I, Grove MA, Haugsja AH, Hinderaker SG. High maternal mortality estimated by the  
467 sisterhood method in a rural area of Mali. BMC Pregnancy Childbirth. 2011; 11(56). doi:  
468 [10.1186/1471-2393-11-56](https://doi.org/10.1186/1471-2393-11-56) PMID: [21812951](https://pubmed.ncbi.nlm.nih.gov/21812951/)
- 469 10. Sharma V, Brown W, Kainuwa MA, Leight J, Nyqvist MB. High maternal mortality in Jigawa State,  
470 Northern Nigeria estimated using the sisterhood method. BMC Pregnancy Childbirth. 2017;  
471 17(163). doi: [10.1186/s12884-017-1341-5](https://doi.org/10.1186/s12884-017-1341-5) PMID: [28577546](https://pubmed.ncbi.nlm.nih.gov/28577546/)
- 472 11. Yaya Y, Lindtjorn B. High maternal mortality in rural south-west Ethiopia: estimate by using the  
473 sisterhood method. BMC Pregnancy Childbirth. 2012; 12(136). doi: [10.1186/1471-2393-12-136](https://doi.org/10.1186/1471-2393-12-136)  
474 PMID: [23176124](https://pubmed.ncbi.nlm.nih.gov/23176124/)
- 475 12. Graham W, Brass W, Snow RW. Estimating maternal mortality: the sisterhood method. Stud Fam  
476 Plann.1989; 20(3):125-35. PMID: [2734809](https://pubmed.ncbi.nlm.nih.gov/2734809/)
- 477 13. Hanley JA, Hagen CA, Shiferaw T. Confidence intervals and sample-size calculations for the  
478 sisterhood method of estimating maternal mortality. Stud Fam Plann.1996; 27(4):220-227.  
479 PMID: [8875734](https://pubmed.ncbi.nlm.nih.gov/8875734/)
- 480 14. World Health Organization, United Nations Children's Fund. The Sisterhood Method for  
481 Estimating Maternal Mortality: Guidance notes for potential users. 1997.
- 482 15. N. Rutenberg, J.M. Sullivan. Direct and indirect estimates of maternal mortality from the  
483 sisterhood method. IRD/Macro International Incl. 1991.
- 484 16. Tesfaye G, Loxton D, Chojenta C, Assefa N, Smith R. Magnitude, trends and causes of maternal  
485 mortality among reproductive aged women in Kersa health and demographic surveillance  
486 system, eastern Ethiopia. BMC Women's Health. 2018; 18(198). doi: [10.1186/s12905-018-  
487 0690-1](https://doi.org/10.1186/s12905-018-0690-1) PMID: [30518368](https://pubmed.ncbi.nlm.nih.gov/30518368/)

- 488 17. Merdad L, Hill K, Graham W. Improving the measurement of maternal mortality: the sisterhood  
489 method revisited. PLoS One. 2013; 8(4):e59834. doi: [10.1371/journal.pone.0059834](https://doi.org/10.1371/journal.pone.0059834) PMID:  
490 [23565171](https://pubmed.ncbi.nlm.nih.gov/23565171/)
- 491 18. Limaso AA, Dangisso MH, Hibstu DT. Neonatal survival and determinants of mortality in Aroresa  
492 district, Southern Ethiopia: a prospective cohort study. BMC Pediatr. 2020; 20(33). doi:  
493 [10.1186/s12887-019-1907-7](https://doi.org/10.1186/s12887-019-1907-7) PMID: [31987037](https://pubmed.ncbi.nlm.nih.gov/31987037/)
- 494 19. Srinivas Goli, Parul Puril, Pradeep S. Salve, Saseendran Pallikadavath, K.S. James. Estimates and  
495 correlates of district-level maternal mortality ratio in India. PLOS GLOBAL PUBLIC HEALTH  
496 2022;2(7). doi: [10.1371/journal.pgph.0000441](https://doi.org/10.1371/journal.pgph.0000441)
- 497 20. Cameron L, Contreras Suarez D, Cornwell K. Understanding the determinants of maternal  
498 mortality: An observational study using the Indonesian Population Census. PLoS One. 2019;  
499 14(6):e0217386. doi: [10.1371/journal.pone.0217386](https://doi.org/10.1371/journal.pone.0217386) PMID: [31158243](https://pubmed.ncbi.nlm.nih.gov/31158243/)

500
